# Supplementary material for: Mucin-Protected Caco-2 Assay to Study Drug Permeation in the Presence of Complex Biorelevant Media
Source: MDPI journal article supplement (doi:10.3390/pharmaceutics14040699), 2022-03-24
Supplement: s1 [file s1]

# Supplementary Materials: Mucin-Protected Caco-2 Assay to Study Drug Permeation in the Presence of Complex Biorelevant Media

Dong Ye, Álvaro López Mármol, Verena Lenz, Patricia Muschong, Anita Wilhelm-Alkubaisi, Manuel Weinheimer, Mirko Koziolok, Kerstin A. Sauer, Loic Laplanche and Mario Mezler

**Table S1.** The transition methods for each of the drugs and its internal standard (IS) in LC-MS/MS.

| Analyte       | Precursor ion (m/z) | Product ion (m/z) | Entrance Potential (eV) | Declustering Potential (eV) | Collision energy (eV) |
|---------------|---------------------|-------------------|-------------------------|-----------------------------|-----------------------|
| ABT-199       | 868.2               | 636.1             | 7                       | 130                         | 36                    |
| Indomethacin  | 358.1               | 139.1             | 10                      | 50                          | 30                    |
| Metoprolol    | 268.3               | 116               | 10                      | 80                          | 27                    |
| Quinidine     | 325.3               | 172.1             | 10                      | 90                          | 51                    |
| Propranolol   | 260.2               | 183               | 10                      | 75                          | 27                    |
| Carvedilol    | 407.3               | 224.1             | 10                      | 83                          | 33                    |
| Indinavir     | 614.6               | 421.1             | 11                      | 49                          | 47                    |
| Furosemide    | 328.9               | 285               | −9                      | −60                         | −23                   |
| Ranitidine    | 315.1               | 176               | 10                      | 40                          | 25                    |
| Sulfasalazine | 399.1               | 316.9             | 10                      | 75                          | 30                    |
| Doxorubicin   | 544.3               | 397               | 12                      | 91                          | 17                    |
| Piroxicam     | 332.1               | 95                | 10                      | 40                          | 51                    |
| Theophylline  | 179.1               | 122               | −10                     | −55                         | −30                   |
| Caffeine      | 195.2               | 138.1             | 10                      | 9                           | 76                    |
| Atenolol      | 267.3               | 190.1             | 10                      | 85                          | 28                    |
| Naproxen      | 231.1               | 185.1             | 10                      | 60                          | 20                    |
| A-12227 (IS)  | 272.2               | 156               | 10                      | 65                          | 24                    |
